# Supplementary material for: The Role of Internal Variability in Regional Climate Change
Source: Copernicus journal article supplement (doi:10.5194/npg-2022-15), 2022-10-19

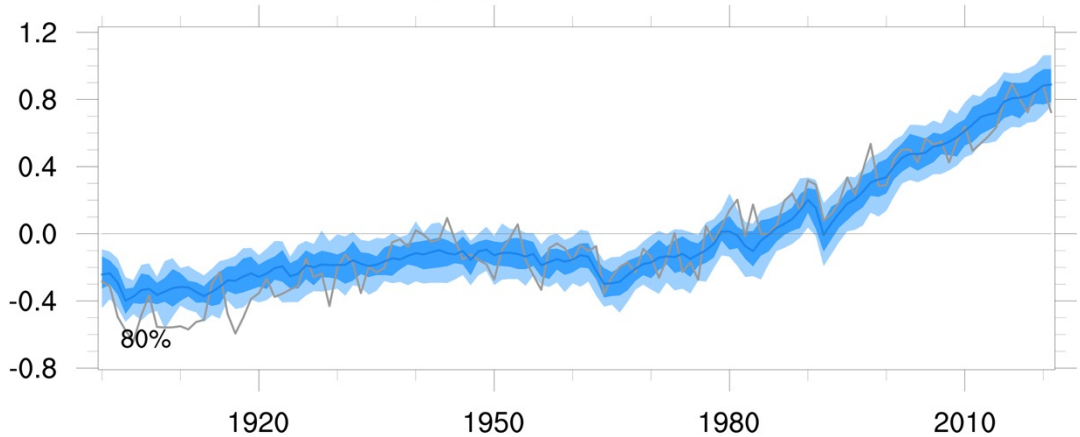

Supplement: Supplementary file [file npg-2022-15-AC3-supplement.pdf]
